# Supplementary material for: Endocrine Disrupting Chemicals Influence Hub Genes Associated with Aggressive Prostate Cancer
Source: MDPI journal article supplement (doi:10.3390/ijms24043191), 2023-02-06
Supplement: s1 [file s1]

## Supplementary Materials

**Table S1:** Gene ontology and pathway enrichment analysis of **260 downregulated** overlapping genes' function in PCa. Top five in biological process (BP), cell component (CC), molecular function (MF), and KEGG.

| BP   | Term       | Count                                              | P-Value | Genes                  |                                                                                                                                                                                                                                                                                                                                                                                                                                                                                                                                                                                              |
|------|------------|----------------------------------------------------|---------|------------------------|----------------------------------------------------------------------------------------------------------------------------------------------------------------------------------------------------------------------------------------------------------------------------------------------------------------------------------------------------------------------------------------------------------------------------------------------------------------------------------------------------------------------------------------------------------------------------------------------|
| 1    | GO:0051301 | Cell division                                      | 18      | 1.65×10 <sup>-11</sup> | CDCA2, CDCA3, UBE2C, CDCA5, CDCA8, NCAPG, BUB1B, ZWINT, AURKA, CCNA2, CCNB2, TPX2, CENPF, CCNB1, NUF2, CKS2, CDK1, BIRC5                                                                                                                                                                                                                                                                                                                                                                                                                                                                     |
| 2    | GO:0032355 | Response to estradiol                              | 6       | 8.26×10 <sup>-6</sup>  | CCNB1, KIF4A, STMN1, NUF2, WDR62, AURKA                                                                                                                                                                                                                                                                                                                                                                                                                                                                                                                                                      |
| 3    | GO:0000281 | Mitotic cytokinesis                                | 6       | 2.85×10 <sup>-5</sup>  | ANLN, RACGAP1, KIF4A, STMN1, NUSAP1, BIRC5                                                                                                                                                                                                                                                                                                                                                                                                                                                                                                                                                   |
| 4    | GO:0044772 | Mitotic cell cycle phase transition                | 4       | 2.4×10 <sup>-4</sup>   | CCNA2, CCNB2, CCNB1, CKS2                                                                                                                                                                                                                                                                                                                                                                                                                                                                                                                                                                    |
| 5    | GO:0030855 | Epithelial cell                                    | 6       | 4.45×10 <sup>-4</sup>  | CASP8, MYC, CASP3, DNMT3B, CYP1B1, EZH2                                                                                                                                                                                                                                                                                                                                                                                                                                                                                                                                                      |
| CC   | Term       | Count                                              | P-Value |                        |                                                                                                                                                                                                                                                                                                                                                                                                                                                                                                                                                                                              |
| 1    | GO:0005829 | Cytosol                                            | 56      | 4.7×10 <sup>-8</sup>   | RPL30, MPI, BUB1B, IKZF1, LMNB1, CASP8, RPS18, CASP3, STMN1, NUF2, RAC3, TK1, MEN1, SREBF1, CKAP2L, RBM18, CCNA2, SAPCD2, BIRC5, BIRC2, CDCA2, AHCY, CDCA3, CDCA5, NCAPG, CDCA8, HMMR, WDR62, AURKA, HSP90B1, NT5C, CCNB2, CCNB1, RACGAP1, HAO1, RPS2, POLR2H, SPTBN2, NPM1, RRM2, UBE2C, ODF2, PTK6, ZWINT, GNMT, ANLN, TPX2, CENPF, KIF4A, ASB9, CDK1, GNAS, BAX, GRB2, FGF13, RPS21                                                                                                                                                                                                       |
| 2    | GO:0005654 | Nucleoplasm                                        | 43      | 9.98×10 <sup>-7</sup>  | TOP2A, CDCA2, CDCA5, CDCA8, TWIST1, IKZF1, MKI67, AURKA, LMNB1, REPIN1, CCNB1, CASP8, RACGAP1, ZIC2, RPS18, MYC, CASP3, NUF2, SNAPC4, DNMT3B, RPS2, POLR2H, MEN1, SREBF1, NPM1, UBE2C, RBM18, CBX2, PTK6, IMP4, ZWINT, CCNA2, ANLN, TPX2, CENPF, SAPCD2, KIF4A, CDK1, BIRC5, GRB2, RPS21, ABCG2, EZH2                                                                                                                                                                                                                                                                                        |
| 3    | GO:0030496 | Midbody                                            | 9       | 5.52×10 <sup>-6</sup>  | ANLN, CENPF, RACGAP1, KIF4A, CDK1, CDCA8, BIRC5, HSP90B1, AURKA                                                                                                                                                                                                                                                                                                                                                                                                                                                                                                                              |
| 4    | GO:0000775 | Chromosome, centromeric region                     | 6       | 2.11×10 <sup>-5</sup>  | TOP2A, CENPF, CDCA5, NUF2, CDCA8, BIRC5                                                                                                                                                                                                                                                                                                                                                                                                                                                                                                                                                      |
| 5    | GO:0000307 | Cyclin-dependent protein kinase holoenzyme complex | 74      | 5.34×10 <sup>-5</sup>  | CCNA2, CCNB2, CCNB1, CDK1, CKS2                                                                                                                                                                                                                                                                                                                                                                                                                                                                                                                                                              |
| MF   | Term       | Count                                              | P-Value |                        |                                                                                                                                                                                                                                                                                                                                                                                                                                                                                                                                                                                              |
| 1    | GO:0003682 | Chromatin binding                                  | 11      | 2.8×10 <sup>-4</sup>   | TOP2A, SREBF1, NPM1, CENPF, CDCA5, CBX2, CDK1, CKS2, DNMT3B, EZH2, MEN1                                                                                                                                                                                                                                                                                                                                                                                                                                                                                                                      |
| 2    | GO:0005515 | Protein binding                                    | 85      | 1.86×10 <sup>-3</sup>  | TOP2A, RPL30, BUB1B, IKZF1, HTR4, MKI67, LMNB1, SEC61A1, CASP8, RPS18, CDH1, MYC, CASP3, STMN1, NUF2, NUSAP1, TNFSF10, PBK, DNMT3B, CYP1B1, RAC3, TK1, MEN1, ABCC4, SREBF1, PAQR6, ARRDC1, IMP4, CPT1B, F5, CCNA2, SFRP4, SAPCD2, CKS2, AGTR1, BIRC5, BIRC2, ABCG2, AHCY, CDCA3, CDCA5, LHB, NCAPG, CDCA8, TWIST1, KLK3, HMMR, WDR62, STYXL1, AURKA, HSP90B1, CCNB2, CCNB1, ERBB3, RACGAP1, RAB26, RPS2, MPZL1, NPM1, RRM2, EGF, UBE2C, GOLM1, ODF2, CBX2, RASSF7, RAB39B, PTK6, ZWINT, GNMT, TPX2, CENPF, MLPH, KIF4A, ASB9, CDK1, GNAS, BAX, GRB2, RPL22L1, SHBG, FGF13, RPS21, CRB3, EZH2 |
| 3    | GO:0019901 | Protein kinase binding                             | 10      | 6.4×10 <sup>-6</sup>   | CCNA2, SREBF1, TPX2, NPM1, CCNB1, RACGAP1, CKS2, RAC3, GRB2, AURKA                                                                                                                                                                                                                                                                                                                                                                                                                                                                                                                           |
| 4    | GO:0008017 | Microtubule binding                                | 7       | 6.9×10 <sup>-6</sup>   | TPX2, CENPF, RACGAP1, KIF4A, NUSAP1, BIRC5, FGF13                                                                                                                                                                                                                                                                                                                                                                                                                                                                                                                                            |
| 5    | GO:0047485 | Protein N-terminus binding                         | 5       | 4.1×10 <sup>-3</sup>   | NPM1, RPS21, BIRC2, ZWINT, MEN1                                                                                                                                                                                                                                                                                                                                                                                                                                                                                                                                                              |
| KEGG | Term       | Count                                              | P-Value |                        |                                                                                                                                                                                                                                                                                                                                                                                                                                                                                                                                                                                              |
| 1    | hsa05200   | Pathways in cancer                                 | 16      | 1.3×10 <sup>-5</sup>   | EGF, KLK3, HSP90B1, CCNA2, CASP8, CDH1, MYC, CASP3, CKS2, AGTR1, GNAS, BAX, BIRC5, RAC3, GRB2, BIRC2                                                                                                                                                                                                                                                                                                                                                                                                                                                                                         |
| 2    | hsa04115   | p53 signaling pathway                              | 7       | 2.3×10 <sup>-5</sup>   | CCNB2, CCNB1, RRM2, CASP8, CASP3, CDK1, BAX                                                                                                                                                                                                                                                                                                                                                                                                                                                                                                                                                  |
| 3    | hsa05215   | Prostate cancer                                    | 4       | 4.2×10 <sup>-5</sup>   | EGF, KLK3, GRB2, HSP90B1                                                                                                                                                                                                                                                                                                                                                                                                                                                                                                                                                                     |
| 4    | hsa04215   | Apoptosis - multiple species                       | 5       | 1.2×10 <sup>-4</sup>   | CASP8, CASP3, BAX, BIRC5, BIRC2                                                                                                                                                                                                                                                                                                                                                                                                                                                                                                                                                              |

|   |          |                     |   |                      |                                                             |
|---|----------|---------------------|---|----------------------|-------------------------------------------------------------|
| 5 | hsa05206 | MicroRNAs in cancer | 6 | $3.8 \times 10^{-3}$ | ERBB3, MYC, CASP3, CDCA5, STMN1, DNMT3B, CYP1B1, GRB2, EZH2 |
|---|----------|---------------------|---|----------------------|-------------------------------------------------------------|

**Table S2:** Gene ontology and pathway enrichment analysis of **109 up-regulated** overlapping genes' functions in PCa. Top five in biological process (BP), cell component (CC), molecular function (MF), and KEGG.

|   | <b>BP</b>   | <b>Term</b>                                          | <b>Count</b> | <b>P-Value</b>        | <b>Genes</b>                                                                                                                                                                                                                                                                                                                                                                                                                                                                                                  |
|---|-------------|------------------------------------------------------|--------------|-----------------------|---------------------------------------------------------------------------------------------------------------------------------------------------------------------------------------------------------------------------------------------------------------------------------------------------------------------------------------------------------------------------------------------------------------------------------------------------------------------------------------------------------------|
| 1 | GO:0016486  | Peptide hormone processing                           | 4            | $1.7 \times 10^{-4}$  | PCSK1N, ECE2, PCSK6, PLA2G7                                                                                                                                                                                                                                                                                                                                                                                                                                                                                   |
| 2 | GO:0015909  | Long-chain fatty acid transport                      | 3            | $1.21 \times 10^{-2}$ | FABP5, APOE, SLC27A4                                                                                                                                                                                                                                                                                                                                                                                                                                                                                          |
| 3 | GO:0006111  | Regulation of gluconeogenesis                        | 3            | $1.27 \times 10^{-2}$ | ZNF692, OGT, FBP1                                                                                                                                                                                                                                                                                                                                                                                                                                                                                             |
| 4 | GO:0001666  | Low-density lipoprotein particle remodeling          | 3            | $1.27 \times 10^{-2}$ | PLA2G2A, APOE, PLA2G7                                                                                                                                                                                                                                                                                                                                                                                                                                                                                         |
| 5 | GO:0019722  | Calcium-mediated signaling                           | 8            | $1.44 \times 10^{-2}$ | BHLHA15, TRPM8, NCALD, CAMKK2, TRPM4                                                                                                                                                                                                                                                                                                                                                                                                                                                                          |
|   | <b>CC</b>   | <b>Term</b>                                          | <b>Count</b> | <b>P-Value</b>        |                                                                                                                                                                                                                                                                                                                                                                                                                                                                                                               |
| 1 | GO:0070062  | Extracellular exosome                                | 48           | $2.57 \times 10^{-6}$ | RAB3B, SPON2, COPA, STEAP4, HPGD, IDUA, ACSM1, CPNE7, COL12A1, HPN, NEDD4L, TXN, EVPL, SLC4A4, THBS4, COMP, C4A, GMDS, TUBB3, EPCAM, MYO6, PABPC1L2B, APOE, TSPAN1, GALNT7, CYP2J2, LRRC26, SLC13A3, MARCKSL1, GDF15, PLA2G2A, TMEM132A, BGN, TMC5, NME1, GGCT, ALDH1A3, BCAM, FOLH1, TUBB2A, FABP5, FASN, SMS, RAB17, SMPDL3B, FBP1, SLC27A2, CFB                                                                                                                                                            |
| 2 | GO:0043025  | Neuronal cell body                                   | 11           | $1.03 \times 10^{-2}$ | C4A, TUBB3, HPN, EEF1A2, RGS10, KCNN2, RAB17, APOE, MAPK8IP2, RAP1GAP, TRPM4                                                                                                                                                                                                                                                                                                                                                                                                                                  |
| 3 | GO:0016323  | Basolateral plasma membrane                          | 8            | $1.25 \times 10^{-3}$ | SLC13A3, HPGD, EPCAM, CLDN8, RAB17, SLC4A4, SLC26A6, SLC19A1                                                                                                                                                                                                                                                                                                                                                                                                                                                  |
| 4 | GO:0005886  | Plasma membrane                                      | 68           | $1.64 \times 10^{-2}$ | EPHB6, RAB3B, KCNG3, STEAP4, CPNE7, CBLC, ECE2, PCSK6, SLC4A4, FGFR1, C4A, SMPD2, SLC13A3, DAPK1, RALGAP2, VSTM2L, ATAD3B, PTP4A3, BCAM, FOLH1, CLDN3, TRAF4, CLDN8, GPR160, CHMP4C, TRIB3, TLCD1, SMPDL3B, ZP3, SLC27A2, CFB, SLC27A4, COLEC12, SHC2, STX19, HPN, SLC43A1, IFI6, NEDD4L, UAP1, ADRB1, EPCAM, MYO6, LRIG1, REPS2, KCNN2, TRPM8, APOE, TSPAN1, SLC19A1, TRPM4, OR51E1, TMEM184A, MARCKSL1, OR51E2, PLA2G2A, PILRB, BAIAP3, SDK1, AMACR, FABP5, FASN, RGS10, PLXNB3, RAB17, OGT, RAMP1, SLC26A6 |
| 5 | GO:0031012  | Extracellular matrix                                 | 8            | $1.95 \times 10^{-2}$ | COLEC12, COMP, SPON2, LRIG1, BGN, COL9A2, APOE, ZP3                                                                                                                                                                                                                                                                                                                                                                                                                                                           |
|   | <b>MF</b>   | <b>Term</b>                                          | <b>Count</b> | <b>P-Value</b>        |                                                                                                                                                                                                                                                                                                                                                                                                                                                                                                               |
| 1 | GO:0016491  | Oxidoreductase activity                              | 10           | $1.18 \times 10^{-3}$ | ALDH1A3, ALDH3B2, HPGD, BDH1, FASN, CHDH, MICAL2, DECR2, PAOX, CBR3                                                                                                                                                                                                                                                                                                                                                                                                                                           |
| 2 | GO:0004467  | Long-chain fatty acid-CoA ligase activity            | 3            | $1.21 \times 10^{-2}$ | ACSM1, SLC27A2, SLC27A4                                                                                                                                                                                                                                                                                                                                                                                                                                                                                       |
| 3 | GO:0005324  | Long-chain fatty acid transporter activity           | 3            | $1.73 \times 10^{-2}$ | FABP5, SLC27A2, SLC27A4                                                                                                                                                                                                                                                                                                                                                                                                                                                                                       |
| 4 | GO:0005198  | Structural molecule activity                         | 9            | $1.92 \times 10^{-2}$ | COPA, CLDN3, KRT17, CLDN8, APOE, MAPK8IP2, EVPL                                                                                                                                                                                                                                                                                                                                                                                                                                                               |
| 5 | GO:0005310  | Dicarboxylic acid transmembrane transporter activity | 5            | $2.25 \times 10^{-2}$ | SLC13A3, SLC25A10                                                                                                                                                                                                                                                                                                                                                                                                                                                                                             |
|   | <b>KEGG</b> | <b>Term</b>                                          | <b>Count</b> | <b>P-Value</b>        |                                                                                                                                                                                                                                                                                                                                                                                                                                                                                                               |
| 1 | hsa05200    | Pathways in cancer                                   | 31           | $1.53 \times 10^{-2}$ | IDUA, ACSM1, GCNT1, UAP1, PLA2G7, ACACA, NME1-NME2, SMPD2, ALDH3B2, GMDS, CBS, CBR3, MCCC2, GALNT7, CYP2J2, ENTPD5, PLA2G2A, B3GAT1, PYCR1, MBOAT2, B3GALT6, NME1, GGCT, ALDH1A3, FOLH1, AMACR, BDH1, FASN, CHDH, SMS, FBP1                                                                                                                                                                                                                                                                                   |
| 2 | hsa04020    | Calcium signaling pathway                            | 7            | $1.54 \times 10^{-2}$ | COLEC12, COMP, TUBB2A, HLA-DMB, SFTPA2, TUBB3, THBS4                                                                                                                                                                                                                                                                                                                                                                                                                                                          |
| 3 | hsa04270    | Metabolic pathways                                   | 4            | $1.90 \times 10^{-2}$ | MARCKSL1, HLA-DMB, EEF1A2, MAPK12                                                                                                                                                                                                                                                                                                                                                                                                                                                                             |
| 4 | hsa04015    | Rap1 signaling pathway                               | 7            | $2.33 \times 10^{-2}$ | COLEC12, COMP, TUBB2A, HLA-DMB, SFTPA2, TUBB3, THBS4                                                                                                                                                                                                                                                                                                                                                                                                                                                          |
| 5 | hsa04014    | Ras signaling pathway                                | 5            | $2.84 \times 10^{-2}$ | AMACR, PEX10, DECR2, SLC27A2, PAOX                                                                                                                                                                                                                                                                                                                                                                                                                                                                            |

**Table S3:** Functional roles of 12 hub genes in biological processes are closely connected to PCa.

| Regulated      | No. | Symbol | Name                                                 | Function                                                                                                                                                                                                                               |
|----------------|-----|--------|------------------------------------------------------|----------------------------------------------------------------------------------------------------------------------------------------------------------------------------------------------------------------------------------------|
| Up-Regulated   | 1   | NCAPG  | Non-SMC Condensin I Complex Subunit G                | Connected with NVAPG and functions as a target of miR-99a-3p in PCa cells, overexpression is connected to castrate-resistant prostate cancers (CRPC), in which a sustained AR signal is yet considered the primary cause of CRPC [61]. |
|                | 2   | MKI67  | Marker of proliferation Ki-67                        | It is connected with two markers for PCa: PSA for tumor cell differentiation and KI-67 for tumor cell proliferation and the epithelial-mesenchymal transition [62].                                                                    |
|                | 3   | TPX2   | Targeting protein for Xenopus kinesin-like protein 2 | TPX2 expression in PCa tissues was increased compared with normal tissues. TPX2 is a microtubule-connected protein linked to mitosis and spindle assembly and targeting TPX2 is a strategy of PCa [63,64].                             |
|                | 4   | CCNA2  | Cyclin A2                                            | CCNA2 contributes to PCa invasion by modulating the expression of metalloproteinase 2 (MMPs), MMP9, and vascular endothelial growth factor (VEGF) and by interacting with AR [65].                                                     |
|                | 5   | CCNB1  | Cyclin B1                                            | Higher levels of CCNB1 in PCa cells may be a beneficial effect of polyploidy and a prognostic biomarker for chemotherapy [66].                                                                                                         |
| Down-Regulated | 6   | CDK1   | Cyclin Dependent Kinase 1                            | CDK1 controlled mitochondrial metabolism for bioenergetics needed for tumor cell survival and overexpression of CDK1 associated with poor prognosis and metastasis in PCa [67].                                                        |
|                | 7   | CCNB2  | Cyclin B2                                            | CCNB2 particularly binds CDC2 to improve cell migration which is connected to the development of CRPC and also plays a critical part in transforming growth factor beta-mediated cell cycle control [68].                              |
|                | 8   | UBE2C  | Ubiquitin-conjugating enzyme E2C                     | UBE2C played an essential function in the pathway of PCa by the WNT- $\beta$ -catenin signaling pathway and NOTCH signaling pathway [69].                                                                                              |
|                | 9   | AURKA  | Aurora kinase A                                      | AURKA considered to be a possible prognostic biomarker for the progression of high-risk small-cell PCa [70].                                                                                                                           |
|                | 10  | BUB1B  | BUB1 mitotic checkpoint serine/threo                 | BUB1B is a critical mitotic checkpoint kinase and identified as the top-scoring kinase by RNA interaction [71].                                                                                                                        |

|  |    |       |                                                |                                                                                                                                                                                                                     |
|--|----|-------|------------------------------------------------|---------------------------------------------------------------------------------------------------------------------------------------------------------------------------------------------------------------------|
|  |    |       | nine kinase B                                  |                                                                                                                                                                                                                     |
|  | 11 | CENPF | Centromere protein F                           | CENPF encodes a protein that associates with the G2 phase, cell growth, protein synthesis, and in the centromere-kinetochore complex and chromosomal segregation, it is related to aggressive prostate cancer [72]. |
|  | 12 | RRM2  | Ribonucleotide reductase regulatory subunit M2 | RRM2 restricts the rate of DNA synthesis and repair. It was believed to be a biomarker in PCa low-risk patients [73,74].                                                                                            |

**Table S4:** Hub Genes for highly DEGs classified in Cytohubba plugin of Cytoscape in the PPI network according to four topological analysis techniques, including MCC, DNMC, Degree, and EPC (Up-regulated five genes: NCAPG, MKI67, TPX2, CCNA2, CCNB1, Down-regulated seven genes: CDK1, CCNB2, AURKA, UBE2C, BUB1B, CENPF, RRM2).

| Rank methods by Topological methods | MCC*    | DNMC*   | Degree  | EPC*  |
|-------------------------------------|---------|---------|---------|-------|
| Top 20 genes                        | NCAPG   | NCAPG   | NCAPG   | NCAPG |
|                                     | HMMR    | KIF4A   | RACGAP1 | KIF4A |
|                                     | RACGAP1 | RACGAP1 | BIRC5   | MYC   |
|                                     | NUSAP1  | BIRC5   | MYC     | CKS2  |
|                                     | KIF4A   | MYC     | MKI67   | MKI67 |
|                                     | MKI67   | MKI67   | TPX2    | TPX2  |
|                                     | TPX2    | TPX2    | TP53    | TP53  |
|                                     | CDCA8   | TP53    | PBK     | ANLN  |
|                                     | PBK     | CDK1    | CDK1    | PBK   |
|                                     | CDK1    | CENPN   | CENPN   | CDK1  |
|                                     | CCNB2   | CCNB2   | CCNB2   | ECT2  |
|                                     | CDCA5   | EZH2    | EZH2    | CCNB2 |
|                                     | AURKA   | AURKA   | AURKA   | EZH2  |
|                                     | UBE2C   | UBE2C   | UBE2C   | AURKA |
|                                     | CCNA2   | CCNA2   | CCNA2   | UBE2C |
|                                     | CCNB1   | CCNB1   | CCNB1   | CCNA2 |
|                                     | BUB1B   | BUB1B   | BUB1B   | CCNB1 |
|                                     | CENPF   | RRM2    | RRM2    | BUB1B |
|                                     | RRM2    | CENPF   | CENPF   | RRM2  |
|                                     | TOP2A   | TOP2A   | TOP2A   | CENPF |

\*MCC: Maximal Clique Centrality, DNMC: Degree, Density of Maximum Neighborhood Component, and EPC: Degree and Edge percolated component.

**Table S5:** The Gleason scores risk-based categorization (Low, Medium, and High risk).

| Grade group | Gleason score | Characteristic                                  | The research categorization |
|-------------|---------------|-------------------------------------------------|-----------------------------|
| 1           | 6             | Less aggressive<br>low risk                     | Low Risk [32, 33]           |
| 2           | (3+4) = 7     | Slightly aggressive<br>Low to intermediate risk |                             |
| 3           | (4+3) = 7     | Moderate aggressive<br>intermediate risk        |                             |
| 4           | 8             | Aggressive<br>High risk                         | High risk [32, 33]          |
| 5           | 9-10          | Highly aggressive<br>High risk                  |                             |

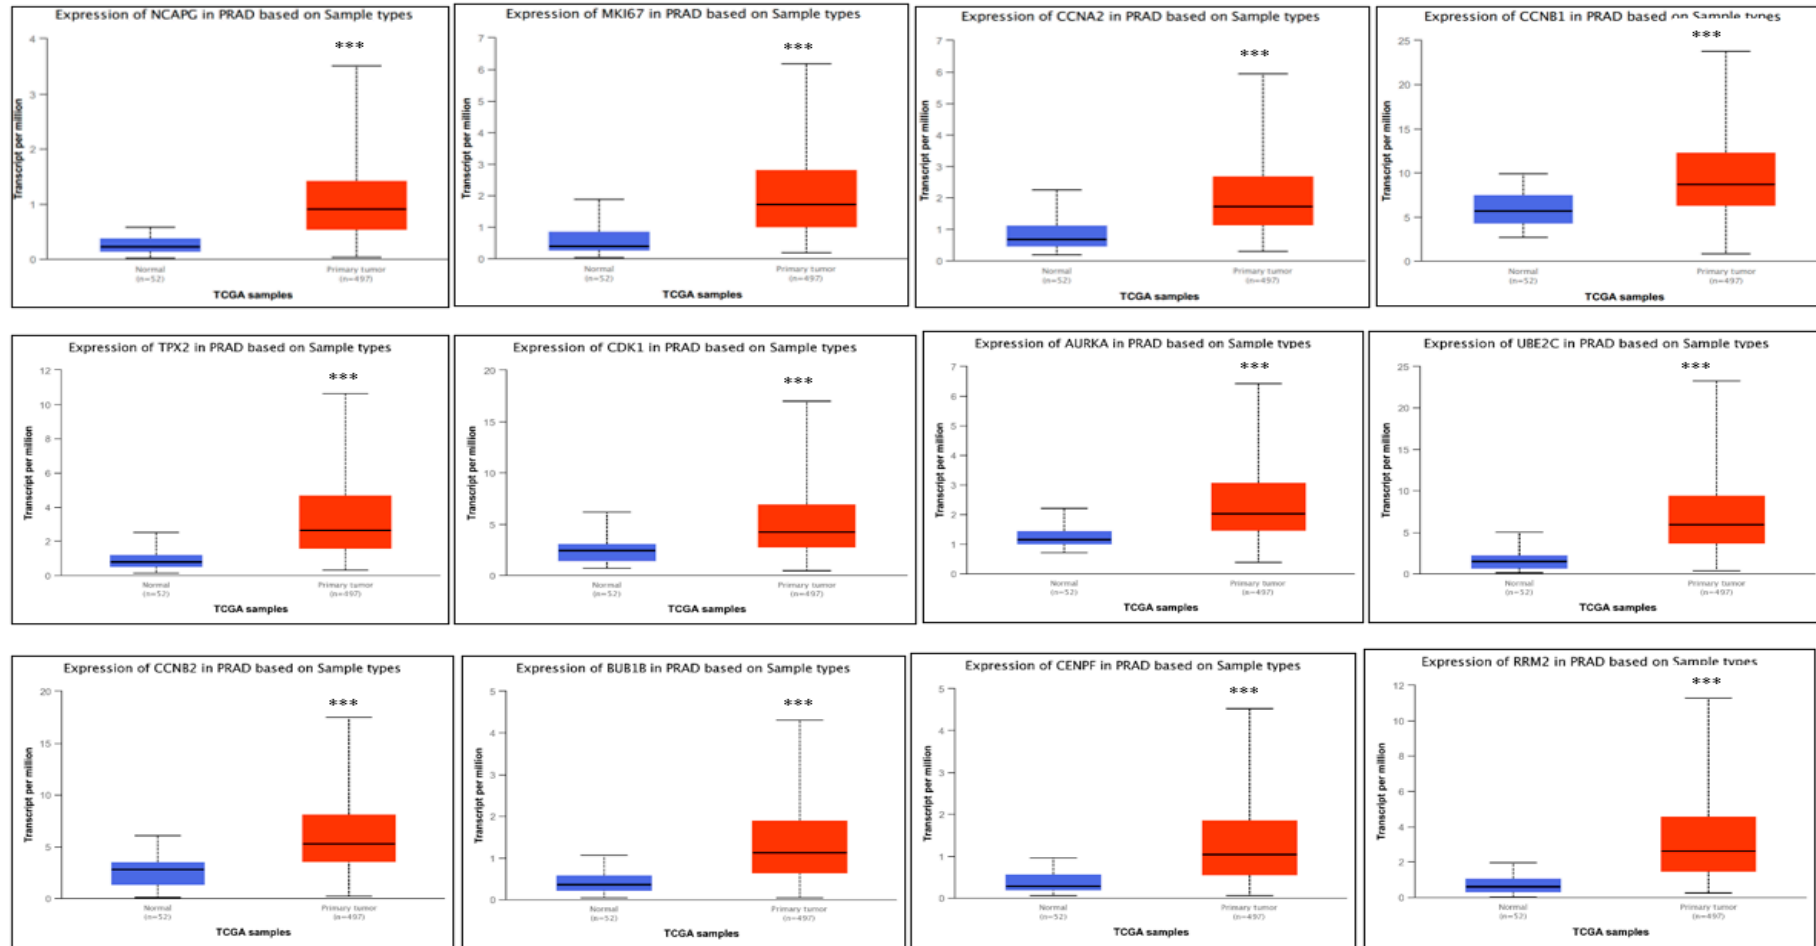

**Figure S1:** Box whisker plots indicate the twelve hub gene expressions in PCa samples. Five Up-Regulated Hub Genes (NCAPG, MKI67, CCNA2, CCNB1, TPX2) and seven Down-Regulated Hub Genes (CDK1, CCNB2, AURKA, UBE2C, BUB1B, CENPF, RRM2) were identified by MCODE and verified at the protein level by UALCAN, which came from the TCGA project. Data are mean  $\pm$  SE. \*\*\*: p-value < 0.001.

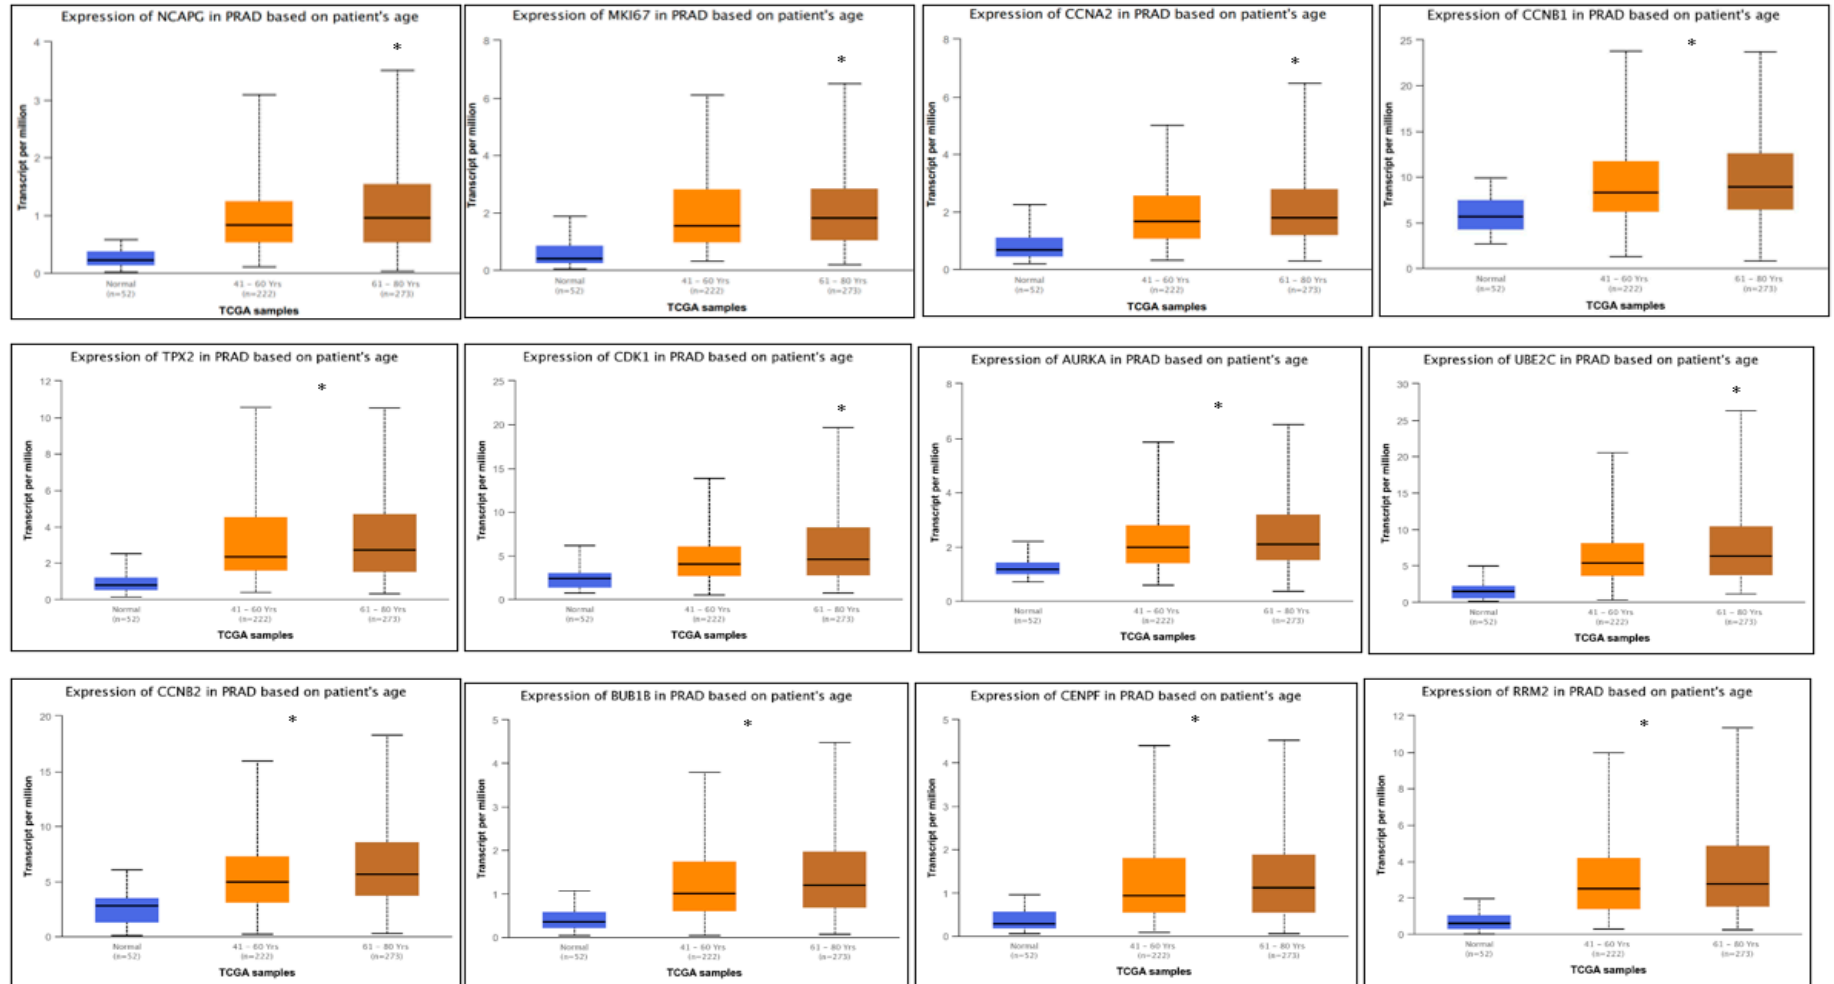

**Figure S2:** Box whisker plots indicate the expressions of twelve hub genes in PCa samples based on the age of patients. Five Up-Regulated Genes (NCAPG, MKI67, CCNA2, CCNB1, TPX2) and seven Down-Regulated Genes (CDK1, CCNB2, AURKA, UBE2C, BUB1B, CENPF, RRM2) were identified by MCODE and verified at the protein level by UALCAN, which came from the TCGA project. Data are mean  $\pm$  SE. \*: p-value < 0.05.

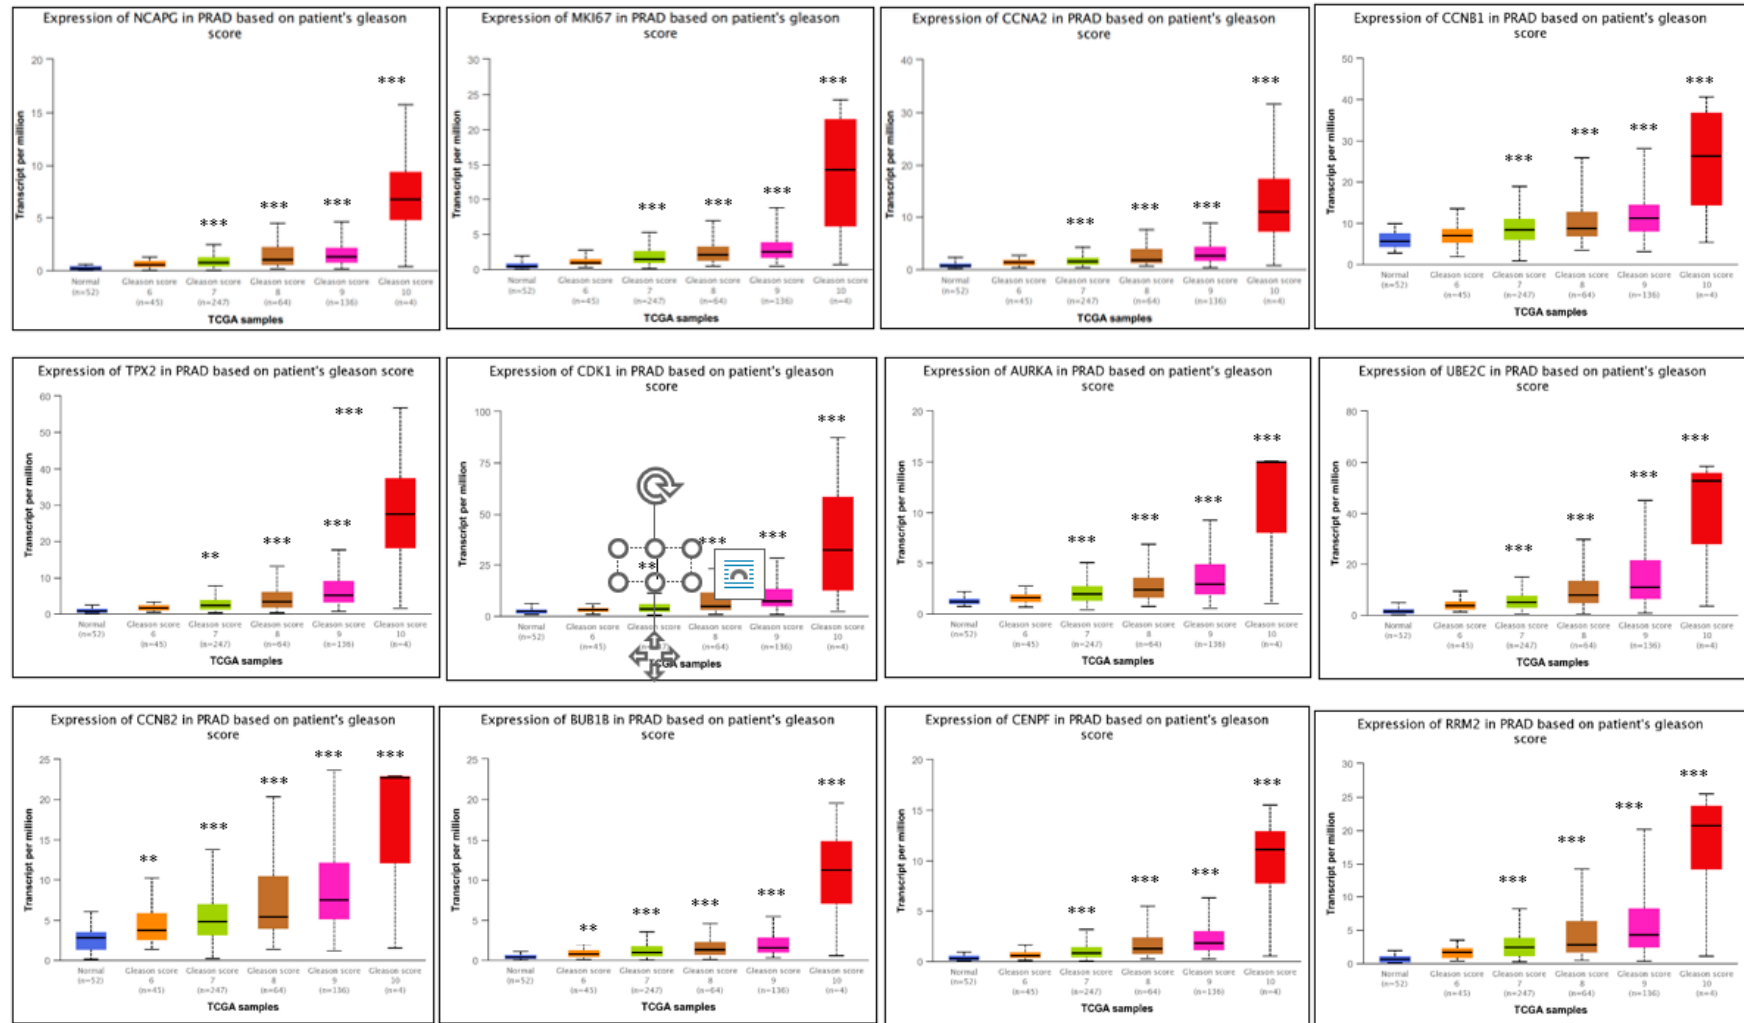

**Figure S3:** Box whisker plots indicate expressions of twelve hub genes' in PCa patients' samples with different Gleason scores. Five Up-Regulated Hub Genes (NCAPG, MKI67, CCNA2, CCNB1, TPX2) and seven Down-Regulated Hub Genes (CDK1, CCNB2, AURKA, UBE2C, BUB1B, CENPF, RRM2) were identified by MCODE and verified at the protein level by UALCAN, which came from the TCGA project. Data are mean  $\pm$  SE. \*\*: p-value < 0.01; \*\*\*: p-value < 0.001.



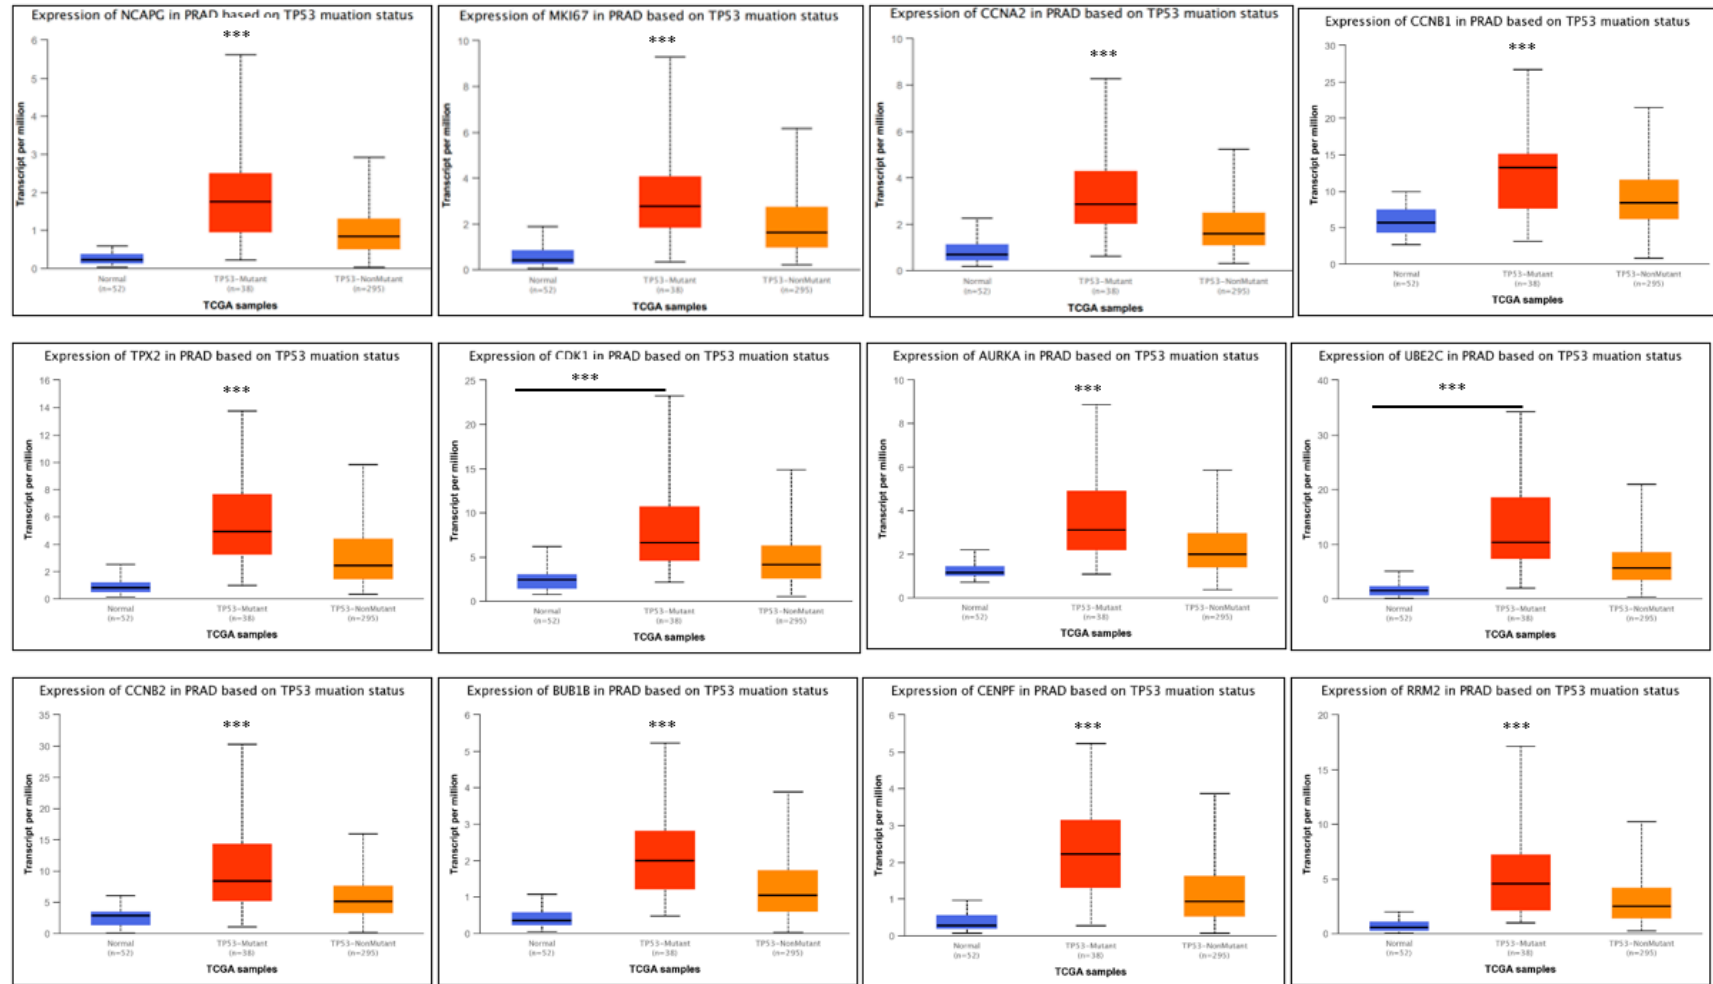

**Figure S4:** Box whisker plots indicate the expression of twelve hub genes in PCa samples with TP53 mutations.. Five Up-Regulated Hub Genes (NCAPG, MKI67, CCNA2, CCNB1, TPX2) and seven Down-Regulated Hub Genes (CDK1, CCNB2, AURKA, UBE2C, BUB1B, CENPF, RRM2) were identified by MCODE and verified at the protein level by UALCAN, which came from the TCGA project. Data are mean  $\pm$  SE. Data are mean  $\pm$  SE. \*\*\*: p-value < 0.001.
